# Supplementary material for: Aggregation-enhanced emission in tetraphenylpyrazine-based luminogens: theoretical modulation and experimental validation
Source: Royal Society of Chemistry journal article supplement (doi:10.1039/d1qm00313e), 2021-01-01
Supplement: d1qm00313e1.pdf [file d1qm00313e1.pdf]

## Supplementary Information for

# Aggregation-Enhanced Emission in Tetraphenylpyrazine-Based Luminogens: Theoretical Modulation and Experimental Validation

Guangshuai Gong,<sup>a</sup> Haozhong Wu,<sup>b</sup> Tian Zhang,<sup>\*a</sup> Zhiming Wang,<sup>\*b</sup> Xinjin Li<sup>a</sup> and Yujun Xie<sup>c</sup>

<sup>a</sup> School of Chemistry and Chemical Engineering, Shandong University of Technology, Zibo 255049, China. E-mail: [tzhang@sdut.edu.cn](mailto:tzhang@sdut.edu.cn)

<sup>b</sup> AIE institute, State Key Laboratory of Luminescent Materials and Devices, Center for Aggregation-Induced Emission, Guangdong Provincial Key Laboratory of Luminescence from Molecular Aggregates (South China University of Technology), Guangzhou 510640, China. E-mail: [wangzhiming@scut.edu.cn](mailto:wangzhiming@scut.edu.cn)

<sup>c</sup> Institute of Molecular Aggregation Science, Tianjin University, Tianjin 300072, China.

## 1. Syntheses and characterizations

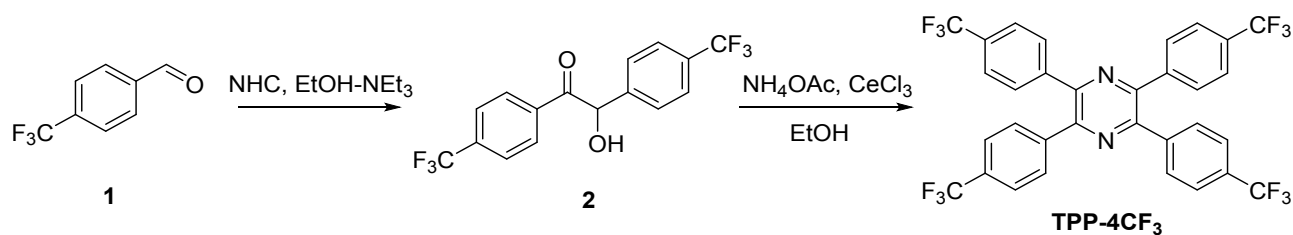

Chart S1 Synthetic routes to TPP-4CF<sub>3</sub>.

2-hydroxy-1,2-bis(4-(trifluoromethyl)phenyl)ethan-1-one (**2**): 4-(trifluoromethyl)benzaldehyde **1** (40 mmol, 6.94 g) and NHC (3-benzyl-4-methyl-5-(2-hydroxyethyl)thiazole-3-ium·chloride) (4 mmol, 1.08 g) were added into two-neck bottle under nitrogen. After then, a mixed solvent system of triethylamine (1.65 mL, 12 mmol) and ethanol (32 mL) was injected into the bottle and the mixture was refluxed overnight under nitrogen atmosphere. After cooling to room temperature, the mixture was poured into water and extracted with dichloromethane three times and the combined organic layers were washed with brine, and then dried over MgSO<sub>4</sub>. The solvent was removed under reduced pressure and the crude product was purified by column chromatography. White powder was obtained in the yield of 80%. <sup>1</sup>H NMR (500 MHz, CD<sub>2</sub>Cl<sub>2</sub>) δ 8.01 (d, *J* = 8.2 Hz, 2H), 7.70 (d, *J* = 8.3 Hz, 2H), 7.61 (d, *J* = 8.1 Hz, 2H), 7.48 (d, *J* = 8.1 Hz, 2H), 6.06 (s, 1H), 4.60 (s, 1H) ppm. <sup>13</sup>C NMR (126 MHz, CD<sub>2</sub>Cl<sub>2</sub>) δ 197.2, 141.5, 135.4, 134.2 (q, *J*<sub>C-F</sub> = 24.9 Hz), 129.8 (q, *J*<sub>C-F</sub> = 26.0 Hz), 128.6, 127.4, 125.4 (q, *J*<sub>C-F</sub> = 2.9 Hz), 125.1 (q, *J*<sub>C-F</sub> = 2.9 Hz), 123.1 (q, *J*<sub>C-F</sub> = 216.3 Hz), 122.6 (q, *J*<sub>C-F</sub> = 217.5 Hz), 75.2 ppm.

2,3,5,6-tetrakis(4-(trifluoromethyl)phenyl)pyrazine (**TPP-4CF<sub>3</sub>**): **2** (3.48 g, 10 mmol), CeCl<sub>3</sub> 7H<sub>2</sub>O (0.37 g, 1 mmol) and NH<sub>4</sub>OAc (1.77 g, 23 mmol) were dissolved in ethanol (25 mL) at two-neck bottle and the mixture was stirring at 80 °C for 4 h. After cooling to room temperature, the mixture was poured into water and extracted with dichloromethane three times and the combined organic layers were washed with brine, and then dried over MgSO<sub>4</sub>. The solvent was removed under reduced pressure and the crude product was purified by column chromatography. Yellow powder was obtained in the yield of 58%. <sup>1</sup>H NMR (500 MHz, CD<sub>2</sub>Cl<sub>2</sub>) δ 7.77 (d, *J* = 8.1 Hz, 8H), 7.65 (d, *J* =

8.2 Hz, 8H) ppm.  $^{13}\text{C}$  NMR (126 MHz,  $\text{CD}_2\text{Cl}_2$ )  $\delta$  147.3, 140.4, 130.2 (q,  $J_{\text{C-F}} = 32.8$  Hz), 129.5, 124.7 (q,  $J_{\text{C-F}} = 3.8$  Hz), 123.3 (q,  $J_{\text{C-F}} = 273.4$  Hz) ppm.

## 2. ESP Explanations

In PRZ, average ESP value of carbon atoms in the pyrazine core is  $-0.56$  ( $-0.10$ ) kcal/mol in solid (solution). In TPP, those values in the pyrazine core and phenyl rings are  $-5.37$  ( $-5.74$ ) kcal/mol and  $-15.70$  ( $-14.65$ ) kcal/mol in solid (solution), respectively. The more negative ESP values in the pyrazine core for TPP compared to PRZ imply that the electron-rich phenyl rings introduce electronic conjugated effect to the electron-deficient pyrazine core. In TPP-4CF<sub>3</sub>, above values are 11.29 (13.46) kcal/mol and 0.85 (2.80) kcal/mol in solid (solution). These results indicate that addition of the electron-withdrawing CF<sub>3</sub> groups to TPP peripheries can nearly equally increase the ESP values of the pyrazine core and phenyl rings by  $\sim 17$  kcal/mol, but the difference between phenyls and pyrazine is still  $\sim 10$  kcal/mol. The electronic conjugated effect of phenyls to pyrazine is not modified. Substitution with electron-donating OCH<sub>3</sub> groups can respectively decrease the ESP values of pyrazine and phenyls to  $-12.28$  ( $-14.78$ ) kcal/mol and  $-17.49$  ( $-17.02$ ) kcal/mol in solid (solution), which demonstrates increased electron density of the whole TPP skeleton and superior electronic conjugation merit of TPP-4OCH<sub>3</sub> to the others.

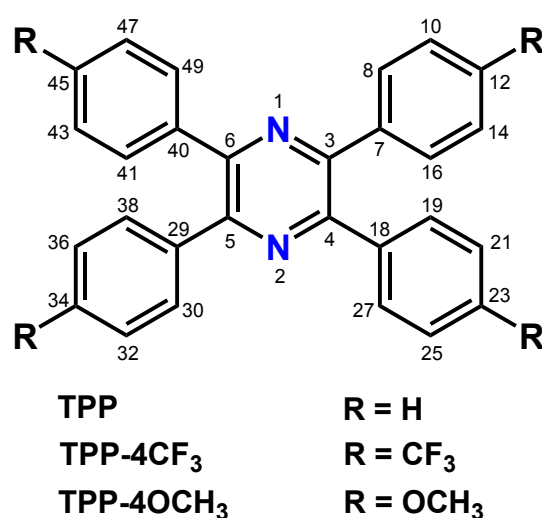

**Chart S2** Molecular structures of TPP and its derivatives with the labeled atom index.

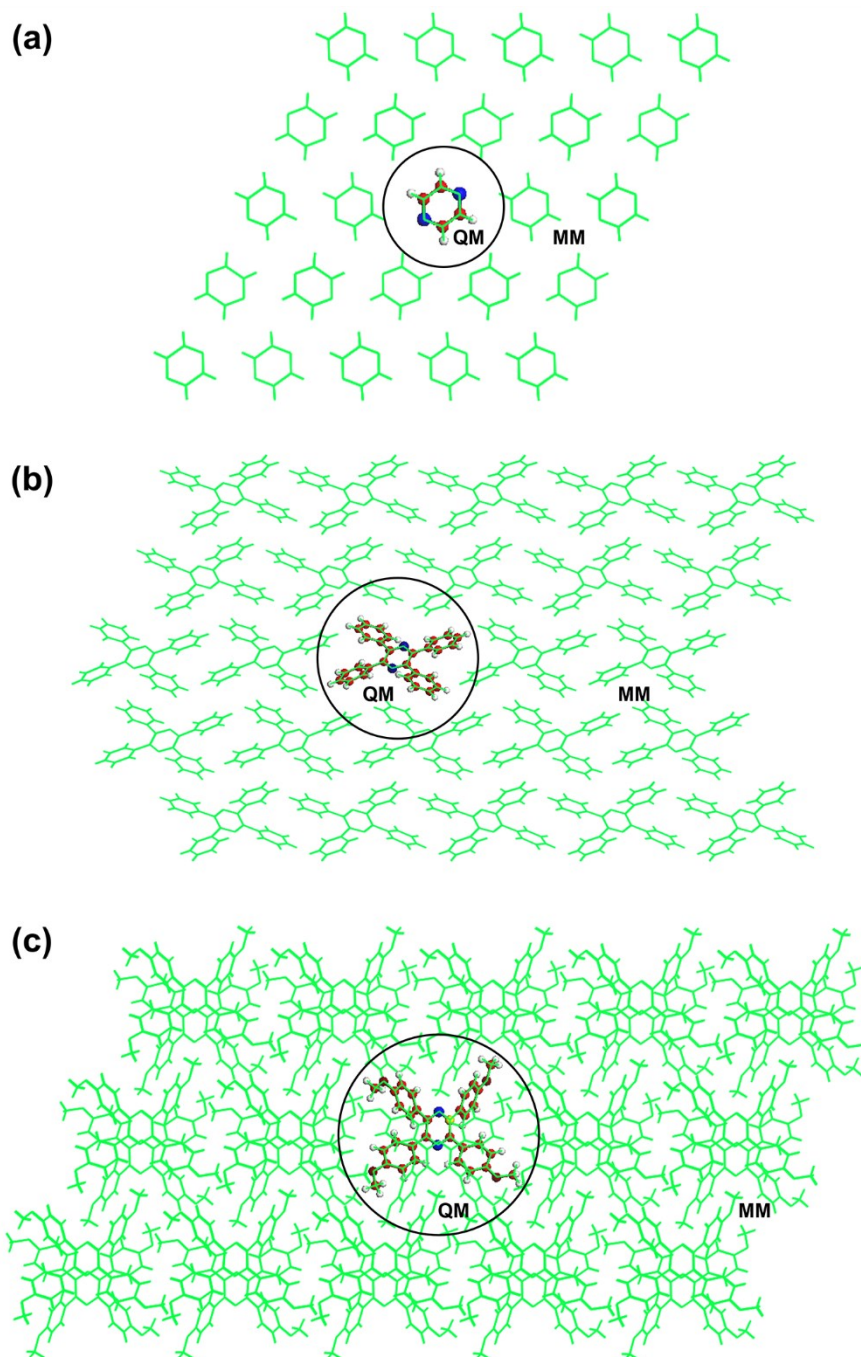

**Fig. S1** Setup of the QM/MM models for PRZ (a), TPP (b) and TPP-4OCH<sub>3</sub> (c), respectively.

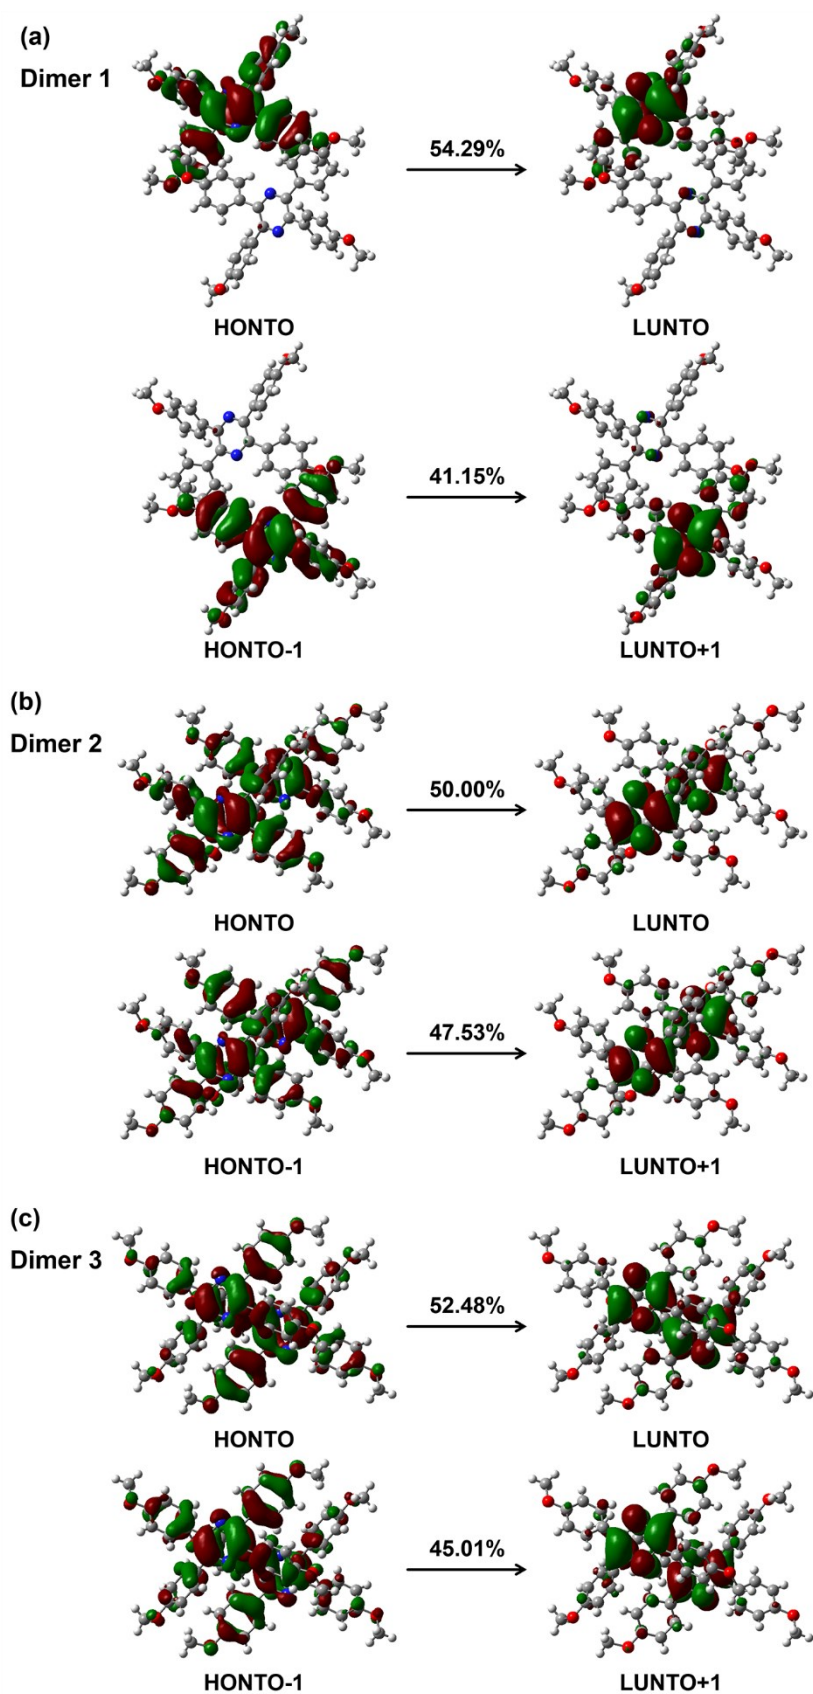

**Fig. S2** Transition characteristics and proportions for dimers within  $\sim 10$  Å of the QM centroid in TPP-4OCH<sub>3</sub> aggregates.

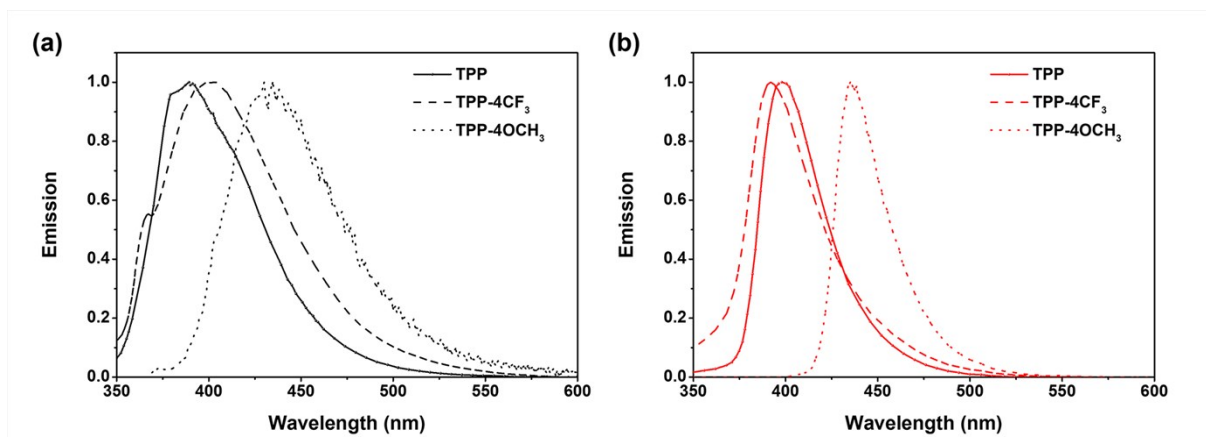

**Fig. S3** Normalized PL spectra of TPP and its derivatives in THF solution ( $10 \mu\text{M}$ ) (a) and crystal ( $\text{Ex} = 310 \text{ nm}$ ) (b).

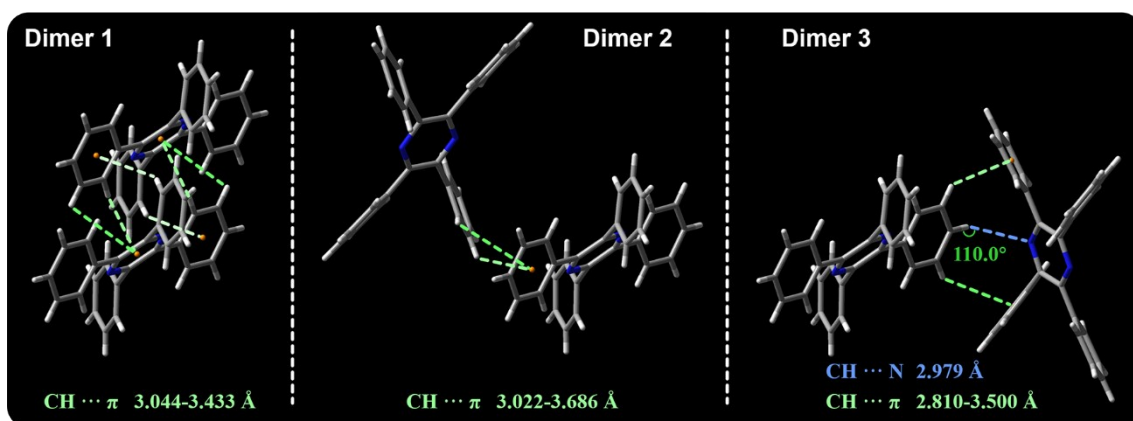

**Fig. S4** Relevant intermolecular interactions for dimers of Fig. 2 in TPP aggregates.

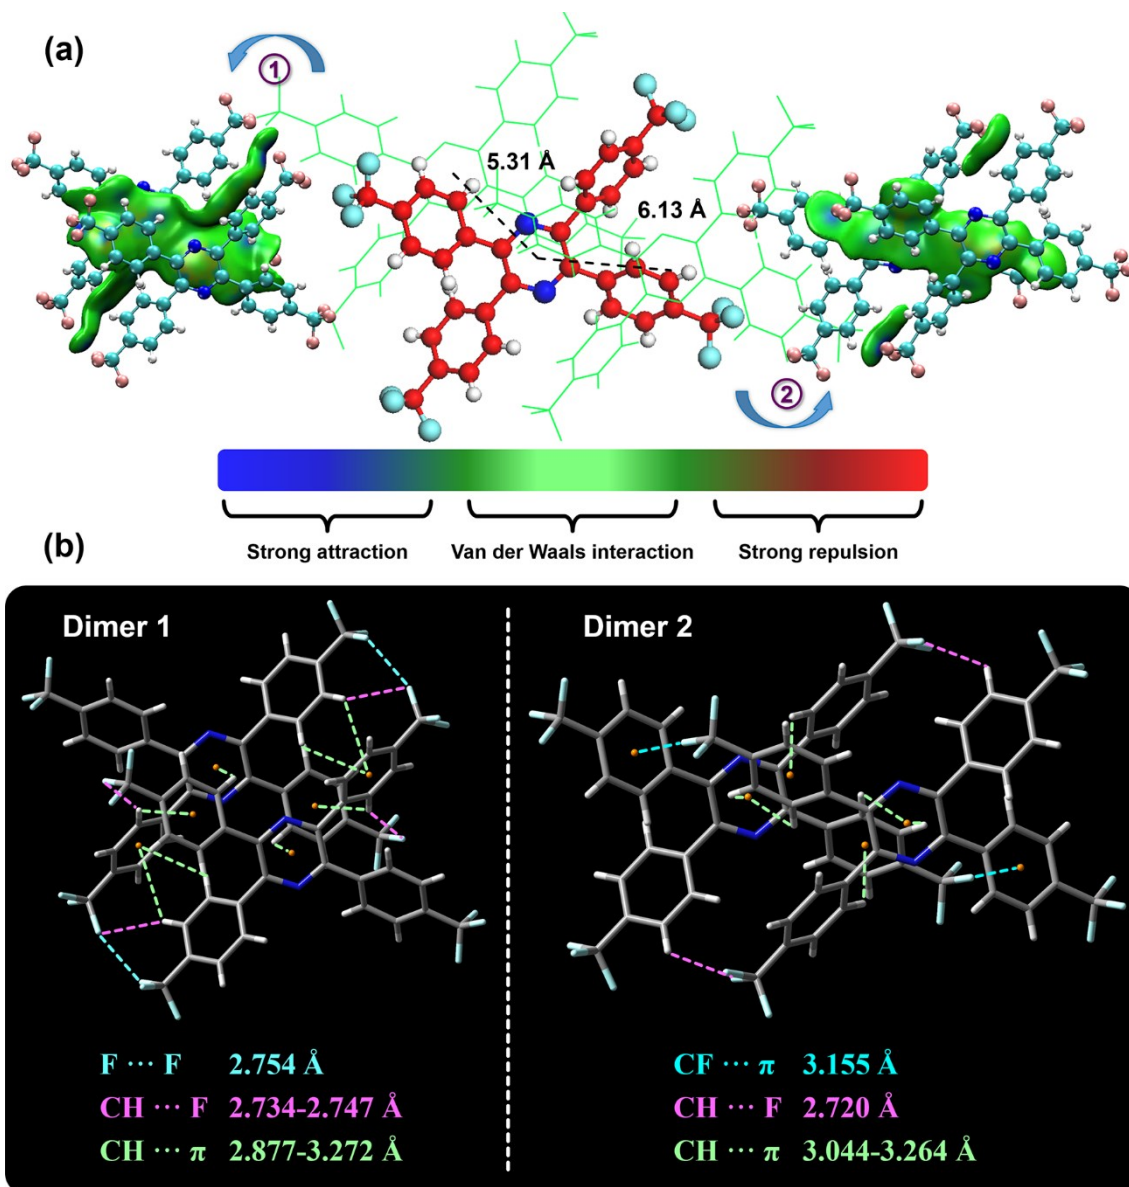

**Fig. S5** Molecular packing structures within  $\sim 10$  Å of the QM centroid (a) and relevant intermolecular interactions (b) in TPP-4CF<sub>3</sub> aggregates.

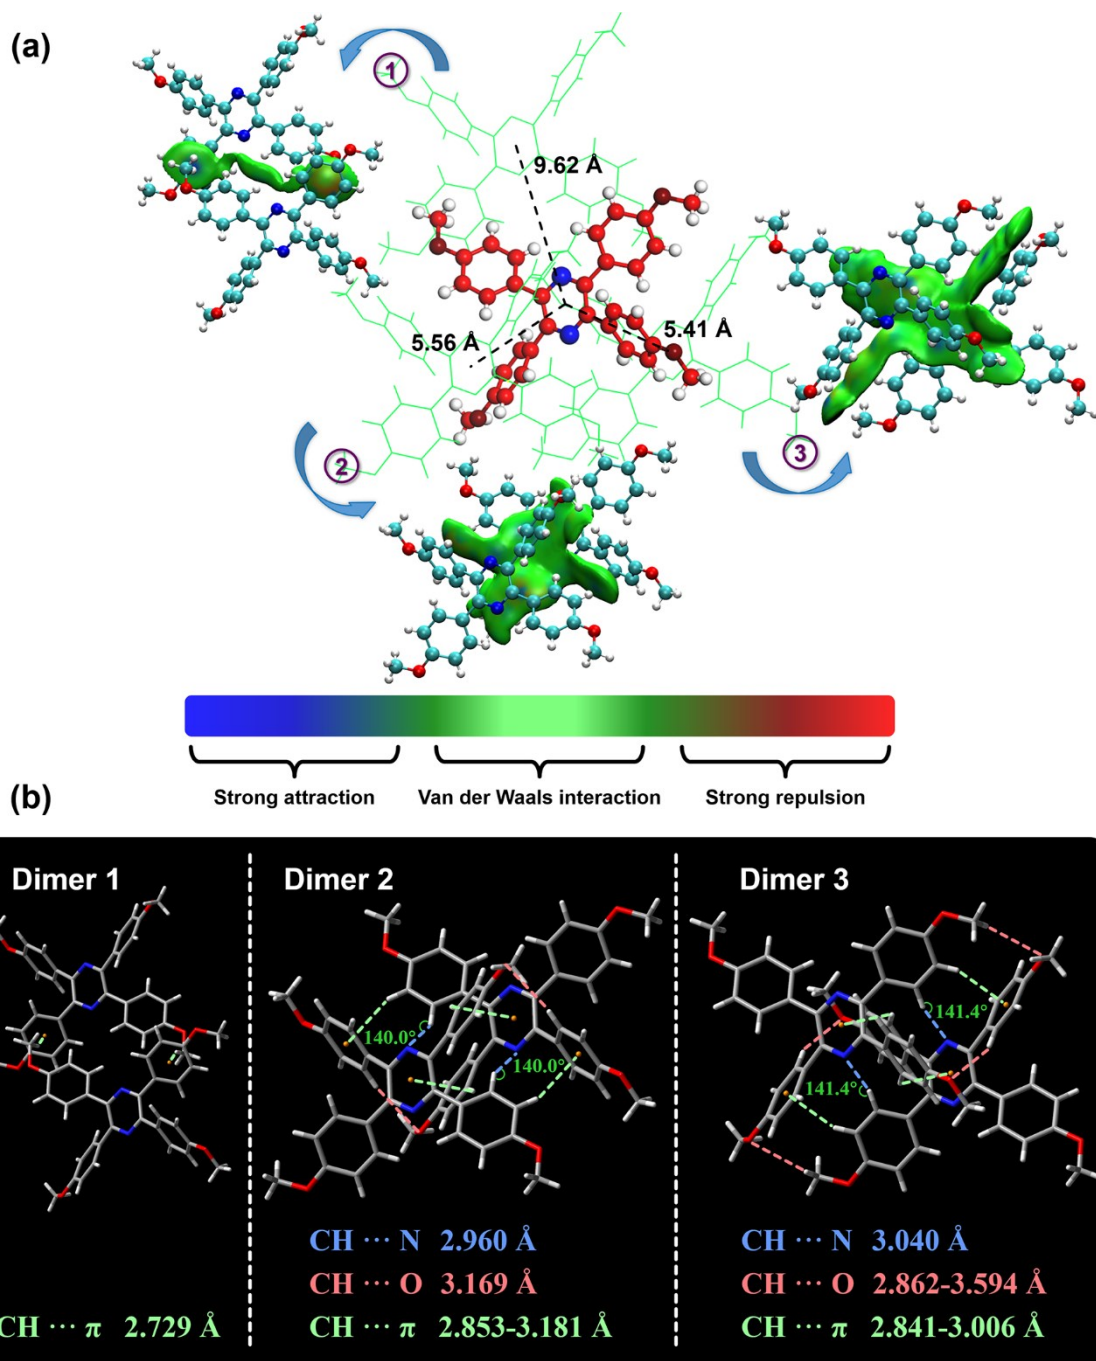

**Fig. S6** Molecular packing structures within  $\sim 10$  Å of the QM centroid (a) and relevant intermolecular interactions (b) in TPP-4OCH<sub>3</sub> aggregates.



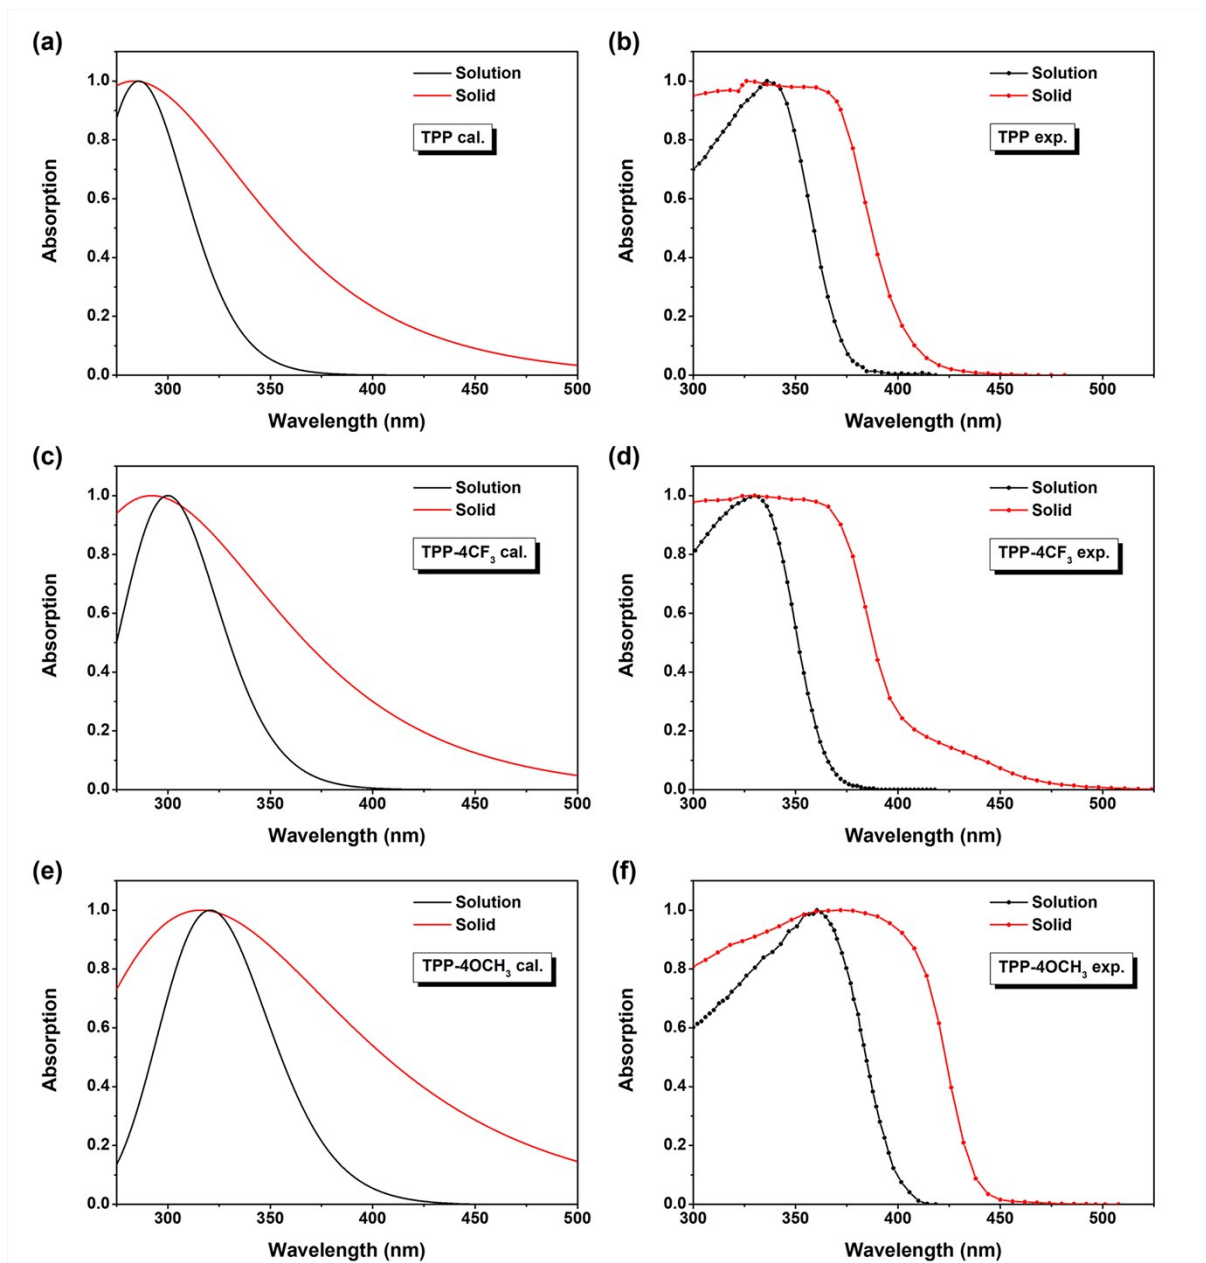

**Fig. S7** Calculated (cal., a, c, e) and experimental (exp., b, d, f) UV-Vis absorption spectra for TPP and its derivatives in THF solution and crystal.

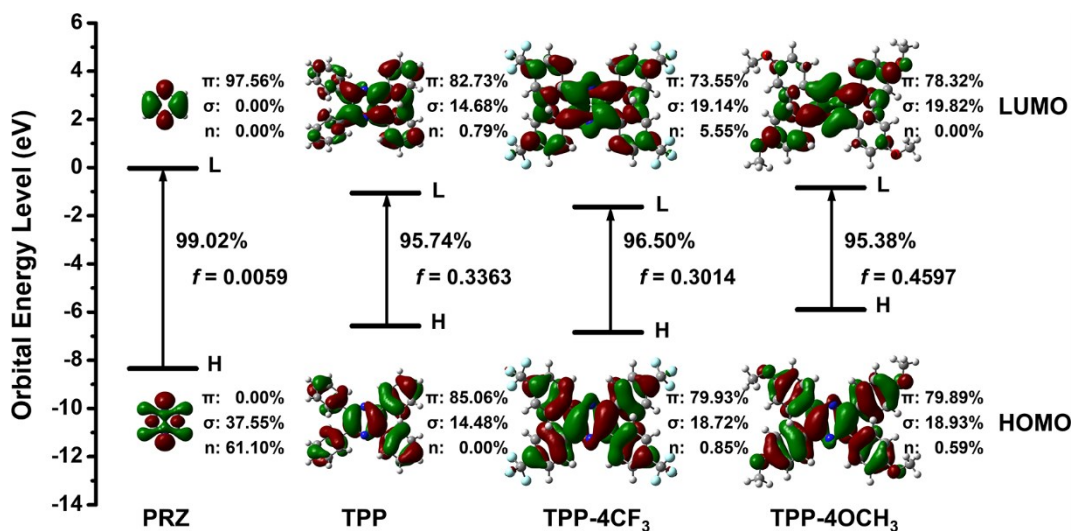

**Fig. S8** Involved molecular orbitals in the energy levels, charge density distributions, transition proportions and oscillator strengths for PRZ, TPP and its derivatives at the  $S_1$ -optimized geometries in solution.

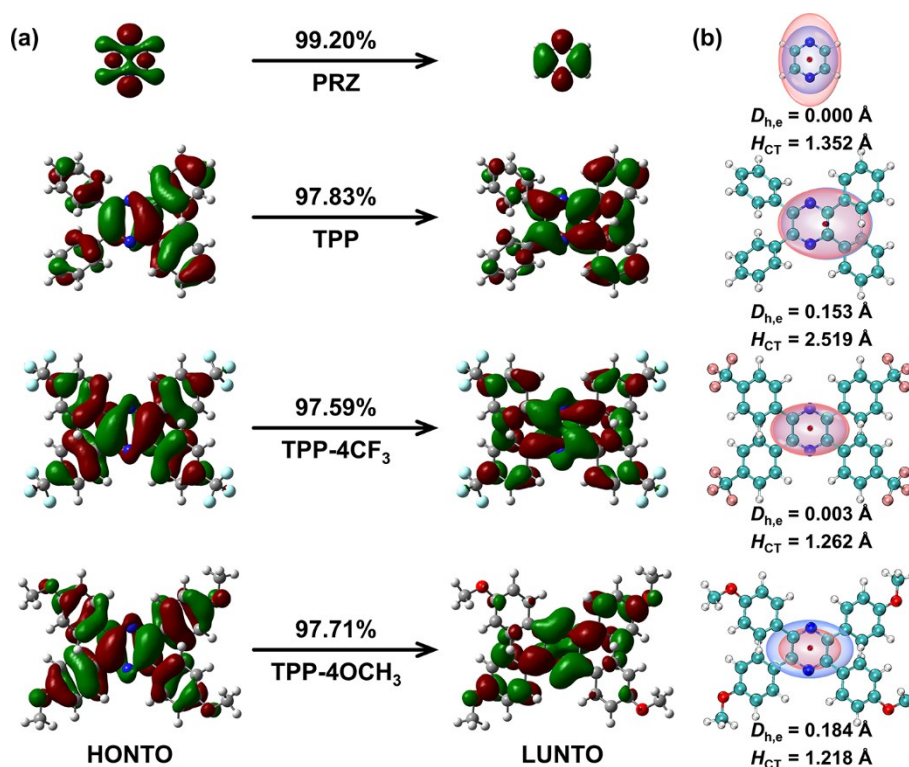

**Fig. S9** NTO characters and transition proportions for PRZ, TPP and its derivatives at the  $S_1$ -optimized geometries in solution (a). Centroids of holes (red region) and electrons (blue region) of the corresponding transition at the optimized structures, with the labels of holes/electrons centers (red/blue point) and two indexes ( $D_{h,e}$  and  $H_{CT}$ ) (b).

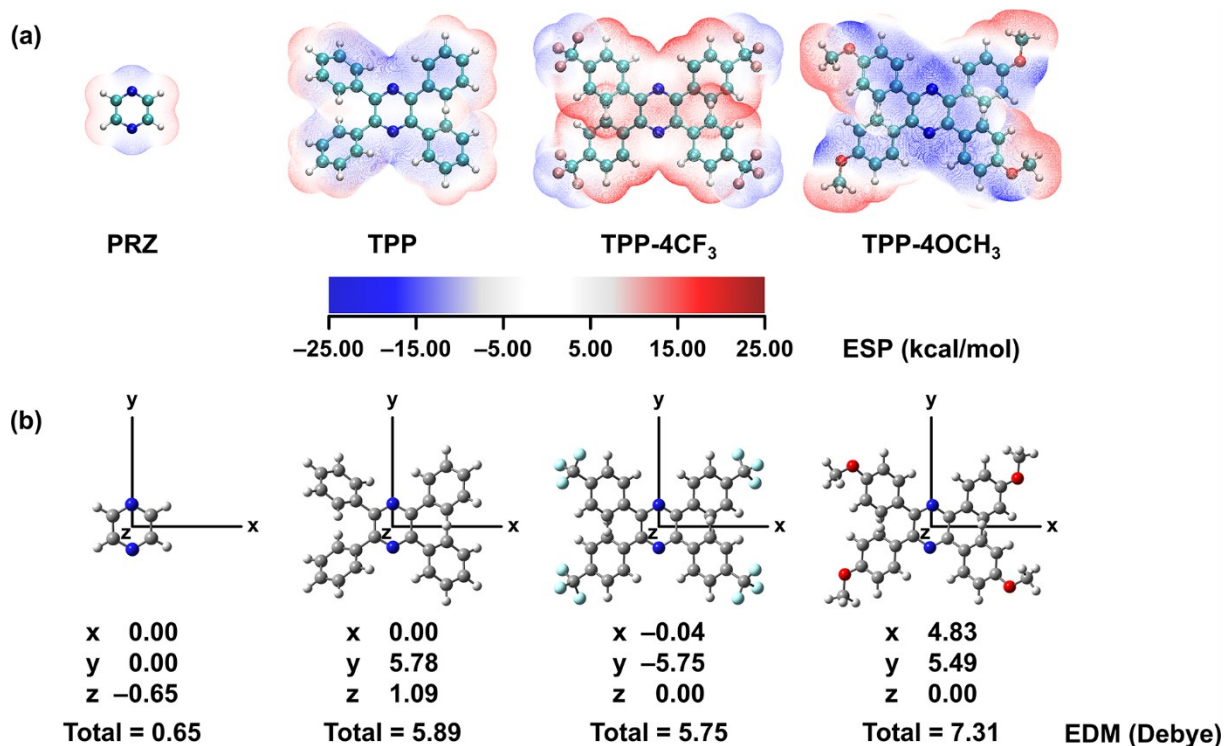

**Fig. S10** ESP isosurfaces of electron density (a) and EDM values (b) for PRZ, TPP and its derivatives at the  $S_1$ -optimized geometries in solution.

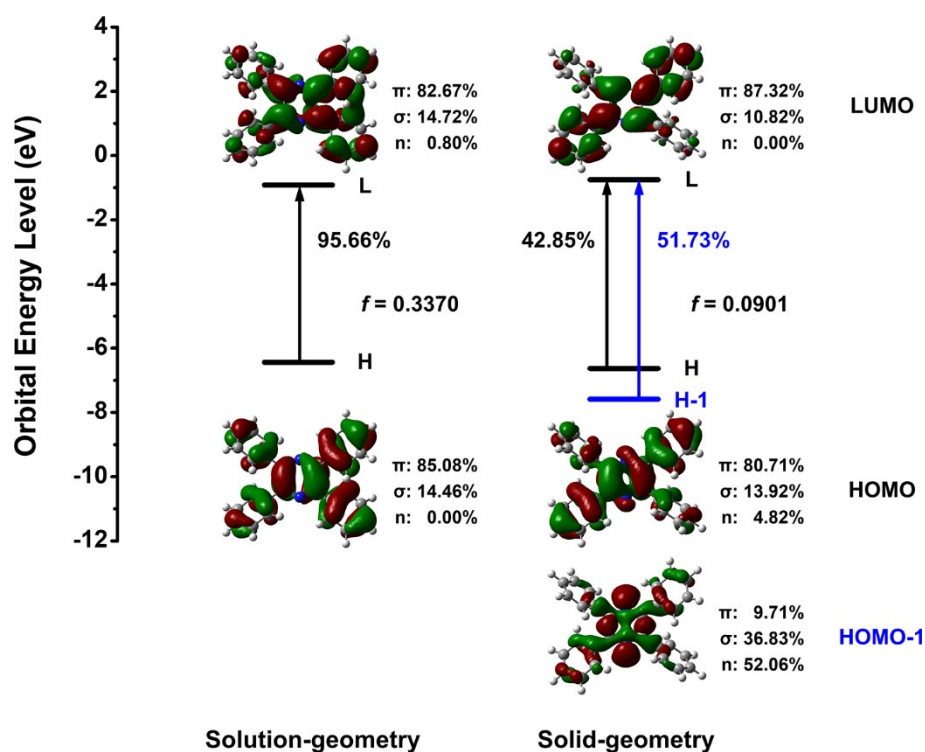

**Fig. S11** Gas-phase transition properties for TPP with molecular structure maintaining  $S_1$ -optimized geometry in solution and solid, respectively.

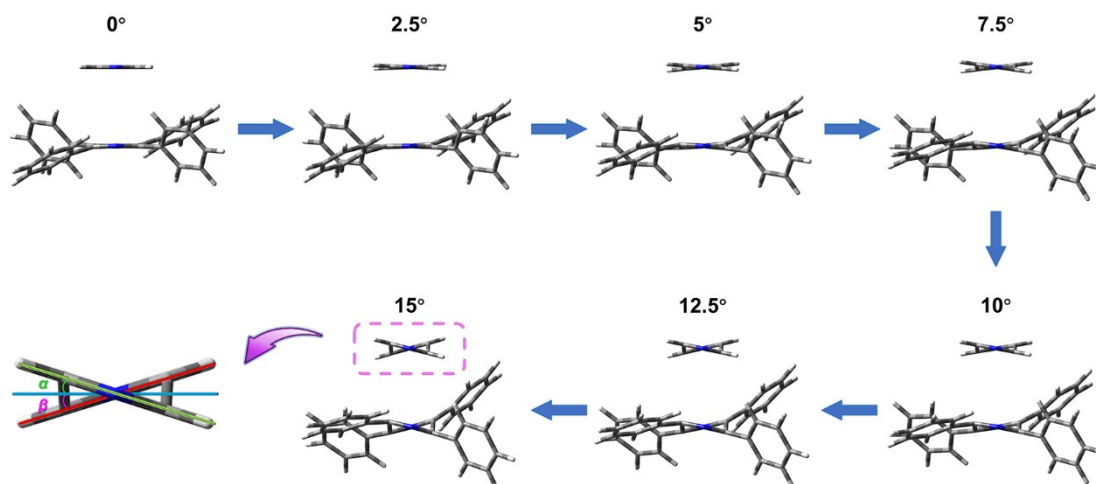

**Fig. S12** Demonstration of molecular motion by twisting the pyrazine ring of TPP and individual PRZ alongside the  $N_1$ - $N_2$  linked axis.

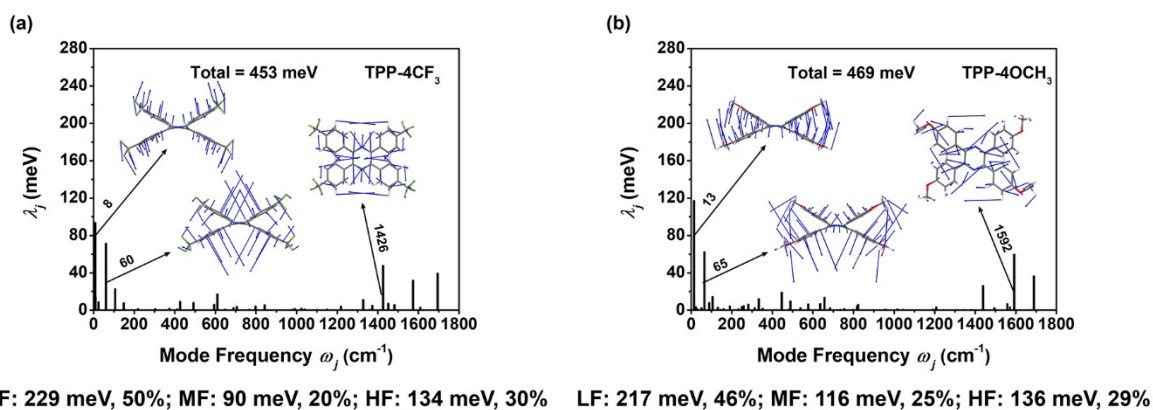

**Fig. S13** Relaxation energy  $\lambda_j$  of each normal mode for TPP-4CF<sub>3</sub> (a) and TPP-4OCH<sub>3</sub> (b) in solution.

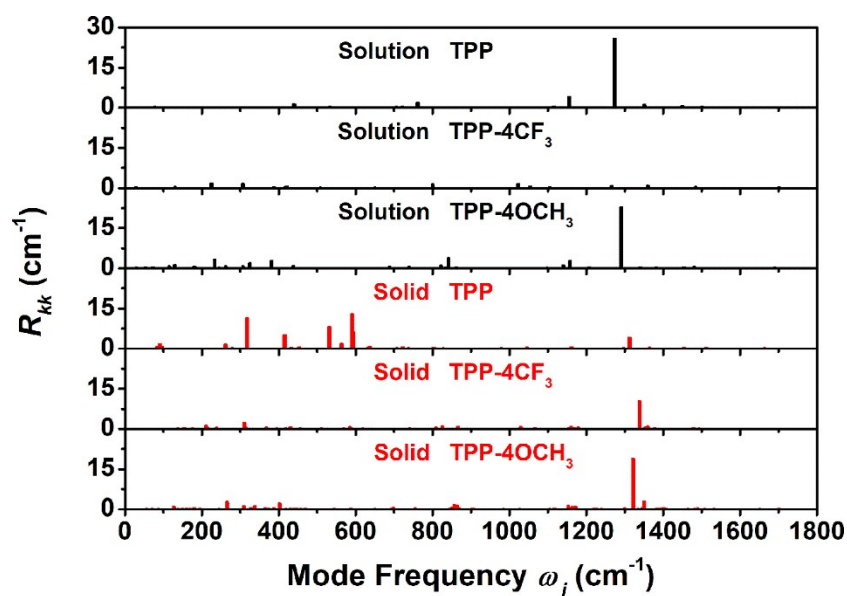

**Fig. S14** Diagonal elements  $R_{kk}$  of the electronic coupling matrix  $R_{kl}$  versus mode frequency  $\omega_j$  for TPP derivatives in solution (black) and solid (red).

**Table S1** Calculated emission wavelengths (in nm) by using different functionals based on the S<sub>1</sub>-optimized geometries at the level of PBE0/6-31G(d), as well as the experimental data (exp.) for TPP and its derivatives in solution and solid.

| Solution  | HF% | TPP              | TPP-4CF <sub>3</sub> | TPP-4OCH <sub>3</sub> |
|-----------|-----|------------------|----------------------|-----------------------|
| exp.      | —   | 390 <sup>a</sup> | 400 <sup>a</sup>     | 433 <sup>a</sup>      |
| CAM-B3LYP | —   | 384              | 417                  | 433                   |
| M062X     | 54  | 383              | 414                  | 430                   |
| BMK       | 42  | 391              | 421                  | 439                   |
| PBE0      | 25  | 418              | 448                  | 472                   |
| B3LYP     | 20  | 431              | 461                  | 487                   |
| Solid     |     |                  |                      |                       |
| exp.      | —   | 398 <sup>b</sup> | 392 <sup>b</sup>     | 435 <sup>b</sup>      |
| CAM-B3LYP | —   | 392              | 386                  | 367                   |
| M062X     | 54  | 402              | 396                  | 364                   |
| BMK       | 42  | 409              | 403                  | 376                   |
| PBE0      | 25  | 434              | 429                  | 414                   |
| B3LYP     | 20  | 445              | 441                  | 430                   |

<sup>a</sup> In THF solution. <sup>b</sup> In crystal.

**Table S2** Selected dihedral angles (in deg) for PRZ in solution and solid. S<sub>0</sub>/S<sub>1</sub> and Δ represent the geometric parameters extracted from the optimized S<sub>0</sub>/S<sub>1</sub> states and the modifications between the two states, respectively.

|     |    | Solution       |                |      | Solid          |                |      |
|-----|----|----------------|----------------|------|----------------|----------------|------|
|     |    | S <sub>0</sub> | S <sub>1</sub> | Δ    | S <sub>0</sub> | S <sub>1</sub> | Δ    |
| PRZ | 5- | 0.07           | 0.01           | 0.06 | 0.14           | -0.09          | 0.23 |
|     | 6- | -0.07          | -0.01          | 0.06 | -0.14          | 0.10           | 0.24 |

**Table S3** Calculated configuration proportion  $\alpha_n\%$  of occupied frontier orbitals for  $S_1$  states based on natural atomic orbital (NAO) method in solid.

| PRZ                                                           |      |              | TPP-4OCH <sub>3</sub>                               |      |              |
|---------------------------------------------------------------|------|--------------|-----------------------------------------------------|------|--------------|
| $\alpha_n\% = 60.70\% * 99.06\% = 60.13\%$                    |      |              | $\alpha_n\% = 0.49\% * (90.15\% + 4.40\%) = 0.46\%$ |      |              |
| Basis                                                         | Atom | $\alpha_n^i$ | Basis                                               | Atom | $\alpha_n^i$ |
| P <sub>Y</sub>                                                | 1(N) | 30.34%       | P <sub>Y</sub>                                      | 1(N) | 0.24%        |
| P <sub>Y</sub>                                                | 2(N) | 30.36%       | P <sub>Y</sub>                                      | 2(N) | 0.25%        |
| TPP                                                           |      |              |                                                     |      |              |
| $\alpha_n\% = 51.81\% * 50.90\% + 4.57\% * 43.58\% = 28.36\%$ |      |              |                                                     |      |              |
| HOMO-1                                                        |      |              | HOMO                                                |      |              |
| Basis                                                         | Atom | $\alpha_n^i$ | Basis                                               | Atom | $\alpha_n^i$ |
| P <sub>Y</sub>                                                | 1(N) | 26.87%       | P <sub>Y</sub>                                      | 1(N) | 2.34%        |
| P <sub>Y</sub>                                                | 2(N) | 24.94%       | P <sub>Y</sub>                                      | 2(N) | 2.23%        |
| TPP-4CF <sub>3</sub>                                          |      |              |                                                     |      |              |
| $\alpha_n\% = 50.63\% * 49.07\% + 5.42\% * 43.52\% = 27.20\%$ |      |              |                                                     |      |              |
| HOMO-1                                                        |      |              | HOMO                                                |      |              |
| Basis                                                         | Atom | $\alpha_n^i$ | Basis                                               | Atom | $\alpha_n^i$ |
| P <sub>Y</sub>                                                | 1(N) | 22.81%       | P <sub>Y</sub>                                      | 1(N) | 4.91%        |
| P <sub>Y</sub>                                                | 2(N) | 27.82%       | P <sub>Y</sub>                                      | 2(N) | 0.52%        |

**Table S4** Calculated configuration proportions  $\alpha_\pi\%$ ,  $\alpha_\sigma\%$  and  $\alpha_n\%$  of occupied frontier orbitals for  $S_1$  states based on NAO method in solid.

| Solid                 | $\alpha_n\%$ | $\alpha_\sigma\%$ | $\alpha_\pi\%$ |
|-----------------------|--------------|-------------------|----------------|
| PRZ                   | 60.13%       | 37.56%            | 0.00%          |
| TPP                   | 28.36%       | 24.79%            | 40.37%         |
| TPP-4CF <sub>3</sub>  | 27.20%       | 23.01%            | 41.49%         |
| TPP-4OCH <sub>3</sub> | 0.46%        | 13.84%            | 79.75%         |

**Table S5** Calculated configuration proportion  $\alpha_n\%$  of occupied frontier orbitals for  $S_1$  states based on NAO method in solution.

| PRZ                                        |      |              | TPP-4OCH <sub>3</sub>                    |      |              |
|--------------------------------------------|------|--------------|------------------------------------------|------|--------------|
| $\alpha_n\% = 61.10\% * 99.02\% = 60.49\%$ |      |              | $\alpha_n\% = 0.59\% * 95.38\% = 0.56\%$ |      |              |
| Basis                                      | Atom | $\alpha_n^i$ | Basis                                    | Atom | $\alpha_n^i$ |
| P <sub>Y</sub>                             | 1(N) | 30.55%       | P <sub>Y</sub>                           | 1(N) | 0.29%        |
| P <sub>Y</sub>                             | 2(N) | 30.55%       | P <sub>Y</sub>                           | 2(N) | 0.29%        |
| TPP                                        |      |              | TPP-4CF <sub>3</sub>                     |      |              |
| $\alpha_n\% = 0.00\% * 95.74\% = 0.00\%$   |      |              | $\alpha_n\% = 0.85\% * 96.50\% = 0.82\%$ |      |              |
| Basis                                      | Atom | $\alpha_n^i$ | Basis                                    | Atom | $\alpha_n^i$ |
| P <sub>Y</sub>                             | 1(N) | 0.00%        | P <sub>Y</sub>                           | 1(N) | 0.42%        |
| P <sub>Y</sub>                             | 2(N) | 0.00%        | P <sub>Y</sub>                           | 2(N) | 0.42%        |

**Table S6** Calculated configuration proportions  $\alpha_\pi\%$ ,  $\alpha_\sigma\%$  and  $\alpha_n\%$  of occupied frontier orbitals for  $S_1$  states based on NAO method in solution.

| Solution              | $\alpha_n\%$ | $\alpha_\sigma\%$ | $\alpha_\pi\%$ |
|-----------------------|--------------|-------------------|----------------|
| PRZ                   | 60.49%       | 37.18%            | 0.00%          |
| TPP                   | 0.00%        | 13.86%            | 81.44%         |
| TPP-4CF <sub>3</sub>  | 0.82%        | 18.06%            | 77.13%         |
| TPP-4OCH <sub>3</sub> | 0.56%        | 18.06%            | 76.20%         |

**Table S7** Average ESP values (kcal/mol) on the local surface of carbon atoms for PRZ, TPP and its derivatives in solid. The mean values of total carbon atoms in a single ring are given in bold. Average of pyrazine core and four phenyl rings are shown in red and blue, respectively.

| Labels               | PRZ          | TPP           | TPP-4CF <sub>3</sub> | TPP-4OCH <sub>3</sub> |
|----------------------|--------------|---------------|----------------------|-----------------------|
| <b>Pyrazine core</b> | <b>-0.56</b> | <b>-5.37</b>  | <b>11.29</b>         | <b>-12.28</b>         |
| C3                   | -0.74        | -5.40         | 11.67                | -12.92                |
| C4                   | -0.36        | -5.14         | 12.36                | -12.61                |
| C5                   | -0.73        | -5.80         | 9.38                 | -11.19                |
| C6                   | -0.42        | -5.13         | 11.75                | -12.41                |
| <b>Phenyl rings</b>  |              | <b>-15.70</b> | <b>0.85</b>          | <b>-17.49</b>         |
| <b>ring 1</b>        |              | <b>-15.33</b> | <b>1.73</b>          | <b>-17.51</b>         |
| C7                   |              | -15.84        | 4.57                 | -20.61                |
| C8                   |              | -16.86        | 1.45                 | -19.97                |
| C10                  |              | -14.24        | 0.24                 | -15.39                |
| C12                  |              | -13.40        | 0.96                 | -12.42                |
| C14                  |              | -15.34        | 0.50                 | -17.90                |
| C16                  |              | -16.30        | 2.65                 | -18.80                |
| <b>ring 2</b>        |              | <b>-15.61</b> | <b>2.05</b>          | <b>-18.52</b>         |
| C18                  |              | -21.70        | 0.52                 | -23.40                |
| C19                  |              | -16.30        | 2.41                 | -19.81                |
| C21                  |              | -13.58        | 4.21                 | -16.63                |
| C23                  |              | -12.30        | 3.44                 | -13.64                |
| C25                  |              | -11.82        | 1.99                 | -17.17                |
| C27                  |              | -17.99        | -0.30                | -20.48                |
| <b>ring 3</b>        |              | <b>-15.44</b> | <b>-0.14</b>         | <b>-16.73</b>         |
| C29                  |              | -16.16        | -1.46                | -21.59                |
| C30                  |              | -17.20        | 0.56                 | -19.74                |
| C32                  |              | -14.72        | 0.98                 | -14.18                |
| C34                  |              | -13.32        | 1.05                 | -10.96                |
| C36                  |              | -15.07        | -0.35                | -15.01                |
| C38                  |              | -16.14        | -1.63                | -18.91                |
| <b>ring 4</b>        |              | <b>-16.42</b> | <b>-0.23</b>         | <b>-17.21</b>         |
| C40                  |              | -22.11        | -2.72                | -24.78                |
| C41                  |              | -17.38        | -0.48                | -19.36                |
| C43                  |              | -14.64        | 1.21                 | -12.38                |
| C45                  |              | -12.99        | 1.56                 | -9.69                 |
| C47                  |              | -12.63        | -0.12                | -16.23                |
| C49                  |              | -18.78        | -0.82                | -20.81                |



**Table S8** Average ESP values (kcal/mol) on the local surface of carbon atoms for PRZ, TPP and its derivatives in solution. The mean values of total carbon atoms in a single ring are given in bold. Average of pyrazine core and four phenyl rings are shown in red and blue, respectively.

| Labels               | PRZ          | TPP           | TPP-4CF <sub>3</sub> | TPP-4OCH <sub>3</sub> |
|----------------------|--------------|---------------|----------------------|-----------------------|
| <b>Pyrazine core</b> | <b>-0.10</b> | <b>-5.74</b>  | <b>13.46</b>         | <b>-14.78</b>         |
| C3                   | -0.07        | -5.75         | 13.48                | -14.20                |
| C4                   | -0.11        | -5.71         | 13.45                | -15.33                |
| C5                   | -0.14        | -5.77         | 13.50                | -14.21                |
| C6                   | -0.08        | -5.72         | 13.41                | -15.37                |
| <b>Phenyl rings</b>  |              | <b>-14.65</b> | <b>2.80</b>          | <b>-17.02</b>         |
| <b>ring 1</b>        |              | <b>-13.71</b> | <b>2.81</b>          | <b>-16.00</b>         |
| C7                   |              | -15.60        | 5.03                 | -19.53                |
| C8                   |              | -14.95        | 3.25                 | -17.02                |
| C10                  |              | -13.31        | 1.30                 | -13.25                |
| C12                  |              | -11.87        | 1.74                 | -11.34                |
| C14                  |              | -12.00        | 2.50                 | -16.21                |
| C16                  |              | -14.52        | 3.05                 | -18.65                |
| <b>ring 2</b>        |              | <b>-13.69</b> | <b>2.80</b>          | <b>-18.03</b>         |
| C18                  |              | -15.43        | 5.02                 | -22.29                |
| C19                  |              | -14.61        | 3.06                 | -19.05                |
| C21                  |              | -11.96        | 2.46                 | -14.74                |
| C23                  |              | -11.88        | 1.76                 | -13.40                |
| C25                  |              | -13.32        | 1.30                 | -18.52                |
| C27                  |              | -14.95        | 3.23                 | -20.17                |
| <b>ring 3</b>        |              | <b>-15.58</b> | <b>2.81</b>          | <b>-16.01</b>         |
| C29                  |              | -19.84        | 5.02                 | -19.60                |
| C30                  |              | -16.34        | 3.23                 | -17.06                |
| C32                  |              | -13.98        | 1.31                 | -13.22                |
| C34                  |              | -13.10        | 1.79                 | -11.23                |
| C36                  |              | -13.51        | 2.46                 | -16.23                |
| C38                  |              | -16.71        | 3.07                 | -18.74                |
| <b>ring 4</b>        |              | <b>-15.61</b> | <b>2.79</b>          | <b>-18.04</b>         |
| C40                  |              | -20.05        | 4.99                 | -22.28                |
| C41                  |              | -16.70        | 3.05                 | -19.10                |
| C43                  |              | -13.49        | 2.47                 | -14.72                |
| C45                  |              | -13.07        | 1.70                 | -13.40                |
| C47                  |              | -13.99        | 1.32                 | -18.54                |
| C49                  |              | -16.38        | 3.24                 | -20.22                |

**Table S9** Rotation magnitude of four phenyls and the configuration proportion  $\alpha_n\%$  of occupied frontier orbitals for TPP in gas phase.

| TPP          |        |        |        |        |
|--------------|--------|--------|--------|--------|
| 1-           | -10.00 | -20.00 | -30.00 | -40.00 |
| 2-           | -10.00 | -20.00 | -30.00 | -40.00 |
| 3-           | 10.00  | 20.00  | 30.00  | 40.00  |
| 4-           | 10.00  | 20.00  | 30.00  | 40.00  |
| $\alpha_n\%$ | 4.12%  | 18.24% | 30.78% | 35.64% |

**Table S10** Twisting degree of the pyrazine ring and the configuration proportion  $\alpha_n\%$  of occupied frontier orbitals for TPP and PRZ in gas phase.

| $\alpha / \beta$ | 0°     | 2.5°   | 5°     | 7.5°   | 10°    | 12.5°  | 15°    |
|------------------|--------|--------|--------|--------|--------|--------|--------|
| TPP              |        |        |        |        |        |        |        |
| $\alpha_n\%$     | 29.00% | 28.45% | 26.10% | 22.16% | 17.09% | 11.86% | 7.71%  |
| PRZ              |        |        |        |        |        |        |        |
| $\alpha_n\%$     | 60.51% | 60.14% | 59.02% | 56.70% | 53.16% | 51.62% | 49.00% |

**Table S11** Relaxation energies (meV) of low-frequency modes ( $\lambda_{LF}$ ,  $<200\text{ cm}^{-1}$ ), mid-frequency modes ( $\lambda_{MF}$ ,  $200\text{--}1400\text{ cm}^{-1}$ ) and high-frequency modes ( $\lambda_{HF}$ ,  $1400\text{--}1800\text{ cm}^{-1}$ ), as well as their contributions to the total  $\lambda_{total}$  for TPP and its derivatives in solution and solid.

| Solution              | $\lambda_{LF}$ | $\lambda_{MF}$ | $\lambda_{HF}$ | $\lambda_{total}$ | $\lambda_{LF}/\lambda_{total}$ | $\lambda_{MF}/\lambda_{total}$ | $\lambda_{HF}/\lambda_{total}$ |
|-----------------------|----------------|----------------|----------------|-------------------|--------------------------------|--------------------------------|--------------------------------|
| TPP                   | 319            | 118            | 162            | 599               | 0.53                           | 0.20                           | 0.27                           |
| TPP-4CF <sub>3</sub>  | 229            | 90             | 134            | 453               | 0.50                           | 0.20                           | 0.30                           |
| TPP-4OCH <sub>3</sub> | 217            | 116            | 136            | 469               | 0.46                           | 0.25                           | 0.29                           |
| Solid                 |                |                |                |                   |                                |                                |                                |
| TPP                   | 95             | 286            | 210            | 591               | 0.16                           | 0.48                           | 0.36                           |
| TPP-4CF <sub>3</sub>  | 50             | 239            | 197            | 486               | 0.10                           | 0.49                           | 0.41                           |
| TPP-4OCH <sub>3</sub> | 62             | 111            | 92             | 265               | 0.23                           | 0.42                           | 0.35                           |

**Table S12** Relaxation energies (meV) from bond length  $\lambda_{bond}$ , bond angle  $\lambda_{angle}$  and dihedral angle  $\lambda_{dihedral}$ , as well as their contributions to the total  $\lambda_{total}$  for TPP and its derivatives in solution and solid.

| Solution              | $\lambda_{bond}$ | $\lambda_{angle}$ | $\lambda_{dihedral}$ | $\lambda_{total}$ | $\lambda_{bond}/\lambda_{total}$ | $\lambda_{angle}/\lambda_{total}$ | $\lambda_{dihedral}/\lambda_{total}$ |
|-----------------------|------------------|-------------------|----------------------|-------------------|----------------------------------|-----------------------------------|--------------------------------------|
| TPP                   | 221              | 7                 | 371                  | 599               | 0.369                            | 0.012                             | 0.619                                |
| TPP-4CF <sub>3</sub>  | 206              | 12                | 235                  | 453               | 0.455                            | 0.026                             | 0.519                                |
| TPP-4OCH <sub>3</sub> | 182              | 18                | 269                  | 469               | 0.388                            | 0.038                             | 0.574                                |
| Solid                 |                  |                   |                      |                   |                                  |                                   |                                      |
| TPP                   | 187              | 196               | 208                  | 591               | 0.316                            | 0.332                             | 0.352                                |
| TPP-4CF <sub>3</sub>  | 184              | 180               | 122                  | 486               | 0.379                            | 0.370                             | 0.251                                |
| TPP-4OCH <sub>3</sub> | 115              | 55                | 95                   | 265               | 0.434                            | 0.208                             | 0.358                                |

**Table S13** Bond angles with large relaxation energies (>1 meV) for TPP and its derivatives in solution and solid.

| Solution             |       |                      |       |                       |       |
|----------------------|-------|----------------------|-------|-----------------------|-------|
| TPP                  | meV   | TPP-4CF <sub>3</sub> | meV   | TPP-4OCH <sub>3</sub> | meV   |
| <b>Junction</b>      |       | <b>Junction</b>      |       | <b>Pyrazine core</b>  |       |
| N2-C4-C18            | 2.46  | N1-C3-C7             | 2.00  | C3-N1-C6              | 3.12  |
| N1-C3-C7             | 2.46  | N2-C5-C29            | 2.00  | C4-N2-C5              | 3.12  |
| C4-C3-C7             | 1.26  | N2-C4-C18            | 1.95  | <b>Junction</b>       |       |
| C3-C4-C18            | 1.26  | N1-C6-C40            | 1.95  | N2-C5-C29             | 2.40  |
| C4-C18-C27           | 1.19  |                      |       | N1-C3-C7              | 2.40  |
| C3-C7-C8             | 1.19  |                      |       | C5-C6-C40             | 1.69  |
| <b>Phenyl rings</b>  |       |                      |       | C3-C4-C18             | 1.69  |
| C19-C18-C27          | 1.07  |                      |       | <b>Phenyl rings</b>   |       |
| C8-C7-C16            | 1.07  |                      |       | C30-C29-C38           | 1.46  |
|                      |       |                      |       | C8-C7-C16             | 1.45  |
| Solid                |       |                      |       |                       |       |
| <b>Pyrazine core</b> |       | <b>Pyrazine core</b> |       | <b>Pyrazine core</b>  |       |
| C3-N1-C6             | 45.63 | C3-N1-C6             | 55.69 | N1-C6-C5              | 11.36 |
| C4-N2-C5             | 41.74 | N1-C3-C4             | 24.18 | C3-N1-C6              | 11.24 |
| N2-C5-C6             | 17.79 | C4-N2-C5             | 16.51 | C4-N2-C5              | 8.71  |
| N1-C3-C4             | 17.13 | N2-C5-C6             | 13.54 | N2-C4-C3              | 7.11  |
| N1-C6-C5             | 6.88  | N1-C6-C5             | 2.78  | <b>Junction</b>       |       |
| N2-C4-C3             | 5.77  | N2-C4-C3             | 1.95  | C5-C6-C40             | 3.29  |
| <b>Junction</b>      |       | <b>Junction</b>      |       | N1-C6-C40             | 2.25  |
| N2-C4-C18            | 15.95 | N2-C5-C29            | 17.32 | C3-C4-C18             | 1.86  |
| N1-C6-C40            | 13.80 | N2-C4-C18            | 13.56 | N2-C4-C18             | 1.67  |
| N2-C5-C29            | 8.47  | N1-C3-C7             | 12.71 | C3-C7-C16             | 1.25  |
| N1-C3-C7             | 7.56  | C3-C4-C18            | 5.72  | <b>Phenyl rings</b>   |       |
| C5-C29-C38           | 2.74  | N1-C6-C40            | 4.81  | C8-C7-C16             | 1.19  |
| C3-C7-C16            | 2.72  | C3-C7-C16            | 2.33  | C30-C29-C38           | 1.03  |
| C3-C4-C18            | 2.35  |                      |       |                       |       |
| <b>Phenyl rings</b>  |       |                      |       |                       |       |
| C30-C29-C38          | 1.33  |                      |       |                       |       |
| C8-C7-C16            | 1.08  |                      |       |                       |       |

**Table S14** N1...N2 distance (in Å) and selected bond angles (in deg) at the optimized S<sub>0</sub> states for TPP and its derivatives. Δ represents the geometric difference between solution and solid.

|             | Solution | Solid  | Δ     | Solution             | Solid  | Δ     | Solution              | Solid  | Δ     |
|-------------|----------|--------|-------|----------------------|--------|-------|-----------------------|--------|-------|
|             | TPP      |        |       | TPP-4CF <sub>3</sub> |        |       | TPP-4OCH <sub>3</sub> |        |       |
| B(N1...N2)  | 2.78     | 2.63   | -0.15 | 2.77                 | 2.62   | -0.15 | 2.77                  | 2.81   | 0.04  |
| A(C3-N1-C6) | 120.83   | 128.28 | 7.45  | 119.81               | 129.35 | 9.54  | 119.05                | 117.69 | -1.36 |
| A(C4-N2-C5) | 120.83   | 128.05 | 7.22  | 119.81               | 127.65 | 7.84  | 119.05                | 117.61 | -1.44 |
